# Supplementary material
Source: PubMed Central journal article supplement (PMC4698891)

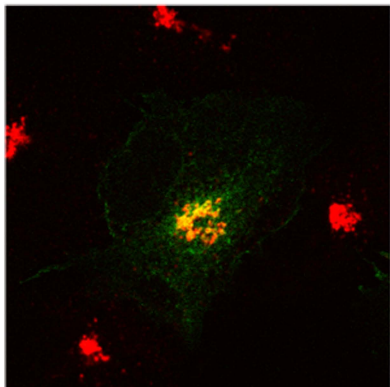

**3'NSM-GFP** and  
**TGN46**

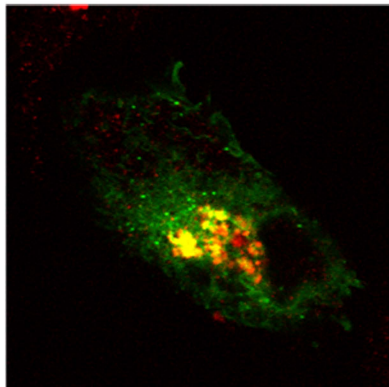

**3'NSM-GFP** and  
**p230**

Supplementary Figure 1

Supplement: NIHMS710591-supplement-Fig_S1.pdf [file NIHMS710591-supplement-Fig_S1.pdf]
